# Supplementary material for: Hydrosoluble hybrid and multifunctional polysiloxane-based photoinitiators for initiating gradient photopolymerization of acrylamide aqueous solution
Source: Royal Society of Chemistry journal article supplement (doi:10.1039/c4ra02623c), 2014-01-01
Supplement: c4ra02623c1.pdf [file c4ra02623c1.pdf]

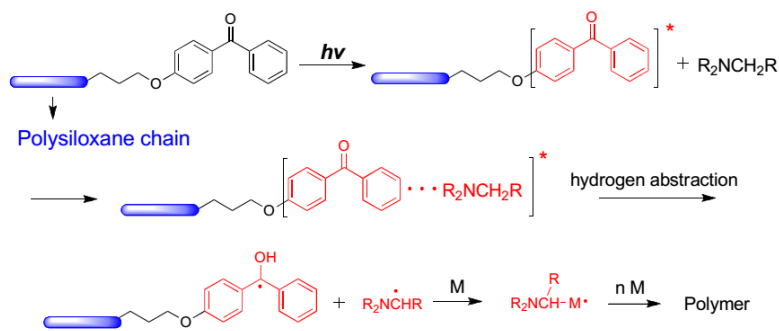

**Scheme. S1** The mechanism of polymerization initiated by W-Si-HBP<sub>4</sub>

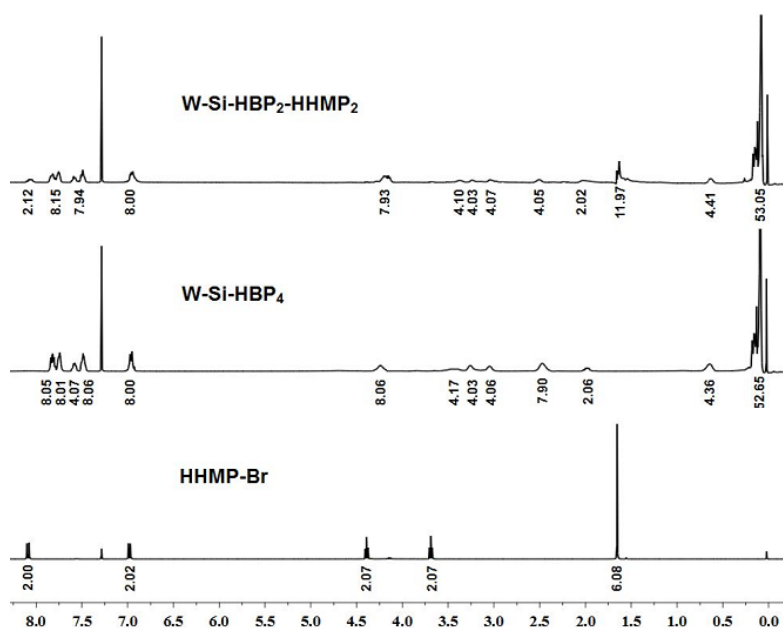

**Fig. S1** <sup>1</sup>H NMR spectra of the photoinitiators W-Si-HBP<sub>2</sub>-HHMP<sub>2</sub>, W-Si-HBP<sub>4</sub> and HHMP-Br.

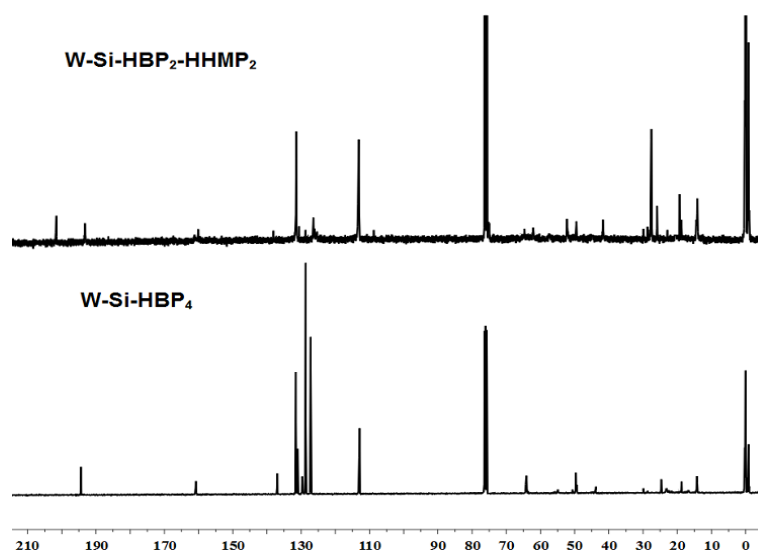

**Fig. S2** <sup>13</sup>C NMR spectra of the photoinitiators W-Si-HBP<sub>2</sub>-HHMP<sub>2</sub> and W-Si-HBP<sub>4</sub>.

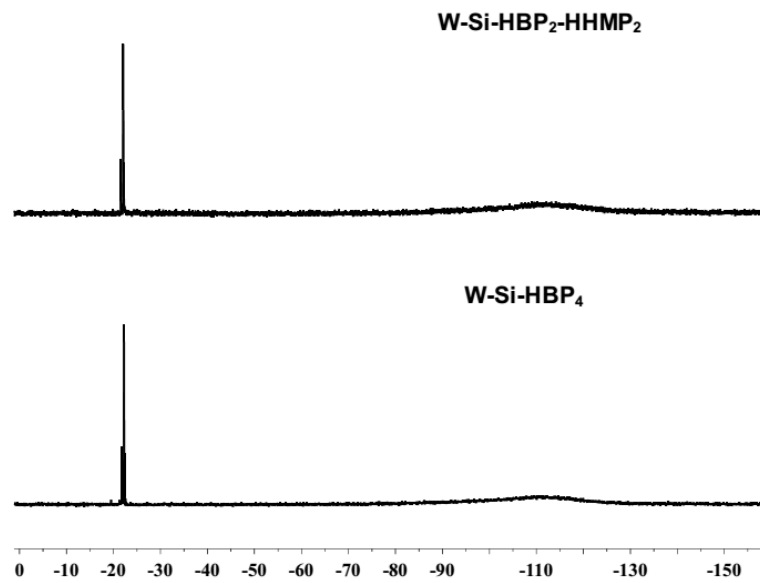

Fig. S3  $^{29}\text{Si}$  NMR spectra of the photoinitiators  $\text{W-Si-HBP}_2\text{-HHMP}_2$  and  $\text{W-Si-HBP}_4$ .

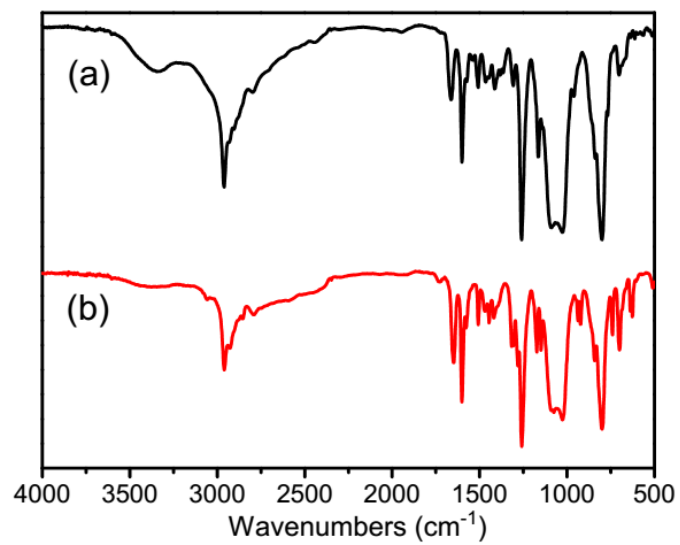

Fig. S4 FTIR spectra of the photoinitiators  $\text{W-Si-HBP}_2\text{-HHMP}_2$  (a) and  $\text{W-Si-HBP}_4$  (b).
